# Supplementary material for: Performance and sensitivity of column-wise and pixel-wise methane retrievals for imaging spectrometers
Source: Copernicus journal article supplement (doi:10.5194/egusphere-2023-1420), 2023-07-28
Supplement: Supplementary file 1 [file egusphere-2023-1420-supplement.pdf]

# Supplementary Information for Performance and sensitivity of column-wise and pixel-wise methane retrievals for imaging spectrometers

Alana K Ayasse<sup>1</sup>, Daniel Cusworth<sup>1</sup>, Kelly O’Neill<sup>1</sup>, Justin Fisk<sup>1</sup>, Andrew K Thorpe<sup>2</sup>, Riley Duren<sup>1,2,3</sup>

5 1Carbon Mapper Inc., Pasadena, CA 91101, USA

2Jet Propulsion Laboratory, California Institute of Technology, Pasadena, CA 91109, USA

3University of Arizona, Tucson, AZ 85721, USA

*Correspondence to:* Alana K Ayasse (alana@carbonmapper.org)

## S1: Concentric Circle IME Method and Results

10 In past publications Carbon Mapper has published data using a different implementation of the IME method. Past publication have used the following equation:

$$Q = \frac{IME}{L} * U_{10}$$

15 Where IME is the total mass in the plume, length is the max fetch and U10 is the wind speed at 10 meters. In addition, previous publications have used an iterative approach, called the concentric circle method, to estimate uncertainty. This means that the max fetch and IME associated with the fetch are iteratively expanded from the origin of the plume until the max fetch or 283 m is reached. The mean and standard deviation are calculated from the combination of iterations. In addition, we use HRRR wind estimates because most plumes do not have 10 m anemometer wind speed measurements available. These methods were  
20 used in Duren 2019 and Cusworth 2022. Here we show the results from the 2022 controlled release using these methods. The fit and bias, while not as good as using the methods presented in the main body of the article, are still good. This indicates that methods employed in previous studies also produce good results.

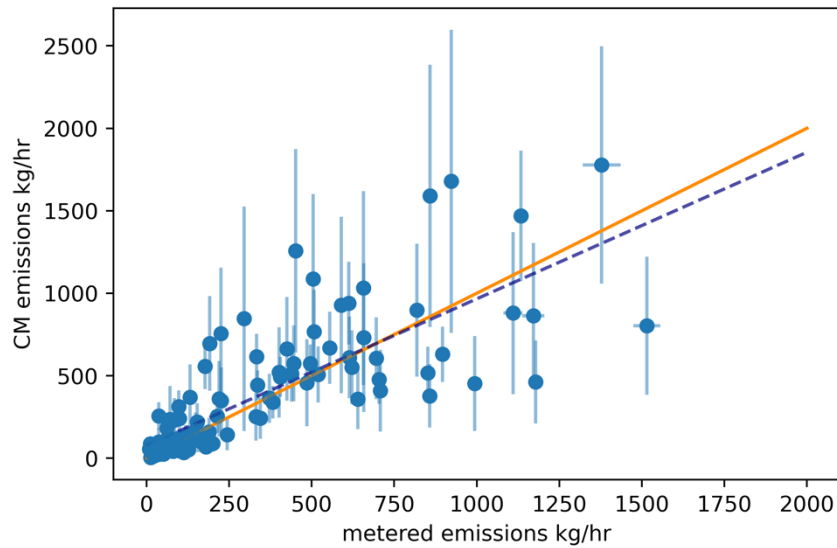

25 **Figure S1: Metered emission rates versus the emission estimates for the 2022 controlled release using Duren e al 2019 methods. An OLS fit to CMF results in  $y = 0.89x + 77$  with  $R^2 = 0.62$ . For both figures the solid line represents the 1:1 line and the dashed line is the OLS fit.**

## S2: Line Length Analysis

For the analysis to determine the minimum line length for good quantification we first Identified 8 plumes that had at least  
 30 three flyovers from GAO. This resulted in 24 individual scenes to analyze. These scenes ranged in pixel lengths from 25,000 to 5,720 pixels with a majority over 10,000 pixels. The plumes within each scene were previously determined to have emission rates between 70.67 and 3981.77 kg/hr. Scenes were acquired from various campaigns including The Permian 2021, DJ Summer 2021, North East 2021, Covid CA 202, and Permian Fall 2021. Emissions sources ranged from coal vents to pipelines and landfills.

35

Each scene was cropped to 2000 pixels centered on the identified plume. This crop was then iteratively increased in 1000 pixel increments until the full scene length was reached. This produced between 6 and 24 cropped images per scene. Each scene crop was processed through the CMF. These cropped scene match filter outputs were then orthorectified and processed through the IME. The curves tended to level off at some point creating a “knee in the curve.” To determine the exact knee in the curve  
 40 we used the KneeLocator function within the Python package kneed.

All 24 scenes were analyzed to determine optimal knee placements; however, only 19 produced usable results. The five scenes which were not included in final analysis failed to resolve an appropriate knee due to variations in their curves. For instance,

the scenes below which observed plume G0011 were excluded as their shapes either produced no knees or set the knee at the  
45 2000 pixel crop or maximum pixel crop, both of which indicate that no real knee is visible within the plotted data.

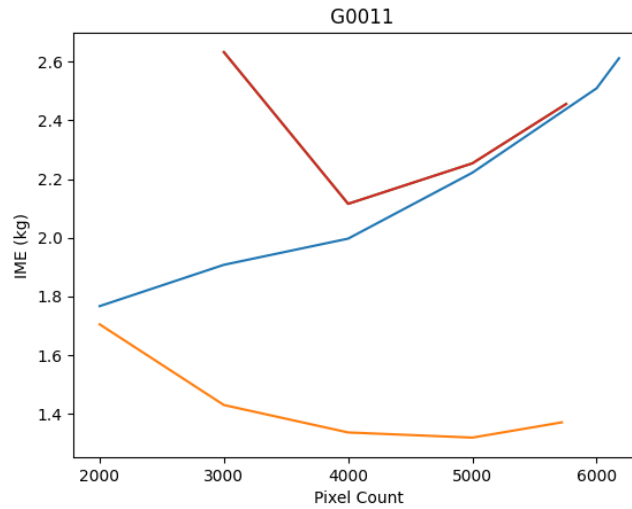

**Figure S2: Pixel count versus the IME for plume G0011 (three images of the same plume on different days). The dynamic of this scene cause the IME to form a concave shape therefore these scenes were left out of the analysis.**

50 The average knee value for the 19 scenes analyzed was of 8172, which was rounded to the nearest crop of 8,000 pixels, and the median knee value was 7000. Within the dataset multiple knees landed on 7,000-pixel crops however two outlier knees located beyond 15,000 pixels increased the average. This analysis led us to conclude that 7000 pixels should be sufficiently long for the controlled release experiment, hence the 20 km flight line in 2022.

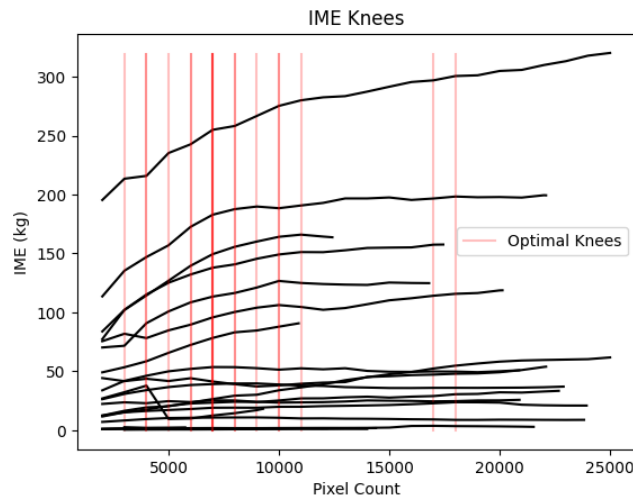

55

**Figure S3: Pixel count versus the IME for all scenes used in the analysis as well as the optimal know for each scene (red).**
